# Supplementary material for: Lipoprotein(a) Testing Trends in a Large Academic Health System in the United States
Source: PubMed Central journal article supplement — J Am Heart Assoc. 2023 Sep 13;12(18):e031255. doi: 10.1161/JAHA.123.031255 (PMC10547299; doi:10.1161/jaha.123.031255), 2023-09-13
Supplement: JAH3-12-e031255-s001.pdf [file JAH3-12-e031255-s001.pdf]

# **Supplemental Material**

**Table S1. ICD and CPT Codes for Data Collection.**

| <b>Diagnosis / Procedure</b>                    | <b>ICD-10 Code</b>           | <b>CPT Code</b>            |
|-------------------------------------------------|------------------------------|----------------------------|
| <b>Lp(a) Test</b>                               | --                           | 83695                      |
| <b>Aortic stenosis</b>                          | I35.0                        | --                         |
| <b>apolipoprotein-B100</b>                      | --                           | 82172                      |
| <b>Coronary artery calcium</b>                  | I25.84                       | --                         |
| <b>Carotid stenosis</b>                         | I65                          | 00                         |
| <b>Chronic kidney disease</b>                   | N18-                         | --                         |
| <b>Coronary computed tomography angiography</b> | --                           | 75571, 75572, 75573, 75574 |
| <b>Diabetes mellitus</b>                        | E08-E13                      | --                         |
| <b>End-stage renal disease</b>                  | N18.6                        | --                         |
| <b>Family history of cardiovascular disease</b> | V17.1, V17.3, Z82.3, Z82.49, | --                         |
| <b>Heart failure</b>                            | I50                          | --                         |
| <b>High-sensitivity C-reactive protein</b>      | --                           | 86140, 86141               |
| <b>Hypothyroidism</b>                           | E03-                         | --                         |
| <b>Ischemic heart disease</b>                   | I20-I25                      | --                         |
| <b>Lipid panel</b>                              | --                           | 80061                      |
| <b>Lipoprotein (NMR)</b>                        | --                           | 83704                      |
| <b>Menopause</b>                                | N95-                         | --                         |
| <b>Peripheral vascular disease</b>              | I73                          | --                         |
| <b>Stroke</b>                                   | I61, I63, I64                | --                         |

CPT = Current Procedural Terminology; ICD = International Classification of Diseases. Other abbreviations as per Table 1 and 2.

**Table S2. Unique Lp(a) Testing by Year in Patients with Incident CVD Diagnoses or Cardiovascular Testing.**

| Unique Lp(a) Testing by Diagnosis by Year        |                              |                            |                             |                            |                            |                            |                            |                             |                           |                            |                  |
|--------------------------------------------------|------------------------------|----------------------------|-----------------------------|----------------------------|----------------------------|----------------------------|----------------------------|-----------------------------|---------------------------|----------------------------|------------------|
|                                                  | Overall                      | 2013                       | 2014                        | 2015                       | 2016                       | 2017                       | 2018                       | 2019                        | 2020                      | 2021                       | P                |
| <b>Diagnosis</b>                                 |                              |                            |                             |                            |                            |                            |                            |                             |                           |                            |                  |
| <b>AS</b>                                        | <b>3.1</b><br>(836/27216)    | <b>3.1</b><br>(51/1642)    | <b>2.5</b><br>(41/1628)     | <b>2.6</b><br>(53/2045)    | <b>3.2</b><br>(117/3699)   | <b>3.9</b><br>(139/3532)   | <b>3.1</b><br>(119/3816)   | <b>2.8</b><br>(106/3740)    | <b>2.7</b><br>(88/3250)   | <b>2.2</b><br>(67/3108)    | <b>0.004</b>     |
| <b>CAC</b>                                       | <b>6.1</b><br>(612/10068)    | <b>7.6</b><br>(14/184)     | <b>4.1</b><br>(10/245)      | <b>5.2</b><br>(50/969)     | <b>5.9</b><br>(51/860)     | <b>7.1</b><br>(78/1040)    | <b>6.9</b><br>(85/1229)    | <b>5.8</b><br>(95/1628)     | <b>5.5</b><br>(99/1785)   | <b>5.9</b><br>(123/2089)   | 0.380            |
| <b>CS</b>                                        | <b>3.2</b><br>(1227/38412)   | <b>3.5</b><br>(61/1768)    | <b>2.3</b><br>(39/1679)     | <b>2.4</b><br>(67/2748)    | <b>2.7</b><br>(138/5041)   | <b>3.4</b><br>(168/4972)   | <b>3.3</b><br>(180/5435)   | <b>3.2</b><br>(186/5746)    | <b>3.5</b><br>(173/4950)  | <b>3.5</b><br>(181/5178)   | <b>0.032</b>     |
| <b>FHx</b>                                       | <b>3.3</b><br>(4623/141128)  | <b>3.6</b><br>(131/3678)   | <b>3.5</b><br>(177/5048)    | <b>3.2</b><br>(242/7493)   | <b>3.1</b><br>(460/14672)  | <b>3.6</b><br>(629/17675)  | <b>3.4</b><br>(697/20434)  | <b>3.2</b><br>(753/23485)   | <b>2.7</b><br>(673/24685) | <b>3.3</b><br>(700/21144)  | <b>&lt;0.001</b> |
| <b>HF</b>                                        | <b>1.9</b><br>(2129/114668)  | <b>1.3</b><br>(71/5437)    | <b>1.5</b><br>(85/5535)     | <b>1.3</b><br>(130/9826)   | <b>1.9</b><br>(294/15115)  | <b>2.3</b><br>(335/14458)  | <b>2.2</b><br>(341/15420)  | <b>1.8</b><br>(295/16670)   | <b>1.8</b><br>(267/15138) | <b>1.7</b><br>(252/14715)  | <b>&lt;0.001</b> |
| <b>IHD</b>                                       | <b>2.9</b><br>(6469/222472)  | <b>4.3</b><br>(516/12034)  | <b>4.2</b><br>(459/11015)   | <b>1.8</b><br>(358/19459)  | <b>2.7</b><br>(820/30641)  | <b>2.7</b><br>(769/28390)  | <b>1.6</b><br>(478/29138)  | <b>2.4</b><br>(733/30159)   | <b>3.2</b><br>(879/27457) | <b>2.7</b><br>(693/25747)  | <b>&lt;0.001</b> |
| <b>PVD</b>                                       | <b>2.0</b><br>(1132/57699)   | <b>2.2</b><br>(78/3618)    | <b>1.7</b><br>(60/3548)     | <b>1.4</b><br>(73/5115)    | <b>1.7</b><br>(124/7129)   | <b>2.2</b><br>(154/7134)   | <b>2.1</b><br>(149/7238)   | <b>2.1</b><br>(161/7821)    | <b>2.0</b><br>(152/7462)  | <b>1.8</b><br>(130/7289)   | 0.062            |
| <b>Stroke</b>                                    | <b>1.7</b><br>(1202/68914)   | <b>1.5</b><br>(60/4119)    | <b>1.4</b><br>(58/4123)     | <b>1.6</b><br>(90/5634)    | <b>1.7</b><br>(141/8435)   | <b>1.6</b><br>(137/8602)   | <b>1.5</b><br>(141/9213)   | <b>1.9</b><br>(183/9623)    | <b>2.1</b><br>(190/9239)  | <b>1.7</b><br>(150/8812)   | 0.175            |
| Unique Lp(a) Testing by Test / Procedure by Year |                              |                            |                             |                            |                            |                            |                            |                             |                           |                            |                  |
|                                                  | Overall                      | 2013                       | 2014                        | 2015                       | 2016                       | 2017                       | 2018                       | 2019                        | 2020                      | 2021                       | P                |
| <b>Test / Procedure</b>                          |                              |                            |                             |                            |                            |                            |                            |                             |                           |                            |                  |
| <b>apoB</b>                                      | <b>63.0</b><br>(5188/8287)   | <b>28.9</b><br>(112/388)   | <b>68.6</b><br>(1172/1709)  | <b>79.6</b><br>(744/935)   | <b>55.7</b><br>(345/619)   | <b>61.9</b><br>(352/569)   | <b>60.4</b><br>(284/470)   | <b>56.2</b><br>(410/729)    | <b>65.5</b><br>(547/835)  | <b>59.4</b><br>(1158/1950) | <b>&lt;0.001</b> |
| <b>Lipoprotein NMR</b>                           | <b>15.8</b><br>(1831/11577)  | <b>9.3</b><br>(201/2164)   | <b>9.5</b><br>(179/1889)    | <b>15.9</b><br>(194/1221)  | <b>32.8</b><br>(212/646)   | <b>48.4</b><br>(267/552)   | <b>34.6</b><br>(284/820)   | <b>23.4</b><br>(239/1020)   | <b>13.3</b><br>(98/736)   | <b>18.5</b><br>(109/589)   | <b>&lt;0.001</b> |
| <b>hsCRP</b>                                     | <b>10.4</b><br>(9543/91327)  | <b>5.5</b><br>(471/8650)   | <b>11.1</b><br>(1381/12451) | <b>10.9</b><br>(1047/9638) | <b>8.7</b><br>(729/8367)   | <b>10.5</b><br>(845/8056)  | <b>11.4</b><br>(1086/9545) | <b>11.3</b><br>(1339/11855) | <b>9.8</b><br>(982/9979)  | <b>13.0</b><br>(1181/9108) | <b>&lt;0.001</b> |
| <b>CCTA</b>                                      | <b>6.8</b><br>(1853/27311)   | <b>2.7</b><br>(22/802)     | <b>2.8</b><br>(41/1473)     | <b>4.1</b><br>(82/1999)    | <b>5.8</b><br>(140/2400)   | <b>9.2</b><br>(236/2580)   | <b>7.3</b><br>(247/3382)   | <b>8.0</b><br>(377/4690)    | <b>7.3</b><br>(338/4629)  | <b>6.9</b><br>(366/5285)   | <b>&lt;0.001</b> |
| <b>Lipid Panel</b>                               | <b>1.8</b><br>(10753/590026) | <b>2.4</b><br>(1893/78113) | <b>1.7</b><br>(1572/92632)  | <b>1.5</b><br>(1224/80807) | <b>1.7</b><br>(1065/64532) | <b>2.0</b><br>(1146/56469) | <b>2.2</b><br>(1142/52083) | <b>1.9</b><br>(1082/57270)  | <b>1.4</b><br>(757/53441) | <b>1.4</b><br>(781/54146)  | <b>&lt;0.001</b> |

The table shows the number of participants who had a CVD diagnosis or cardiovascular testing in a given year and Lp(a) testing any time from 2012-2021. Values are presented as % (n with Lp(a) test / n diagnosed). The p-value refers to the trend in the rate of testing for each diagnosis of the study period. apoB = apolipoprotein-B100, AS = aortic stenosis, CAC = coronary artery

calcification, CCTA = coronary computed tomography angiography, CS = carotid stenosis, FHx = family history of CVD, HF = heart failure, hsCRP = high-sensitivity C-reactive protein, IHD = ischemic heart disease, NMR = nuclear magnetic resonance, PVD = peripheral vascular disease.

**Table S3. Unique Lp(a) Testing by Year in Patients with Other Related Diagnoses.**

|                       | Unique Lp(a) Testing by Diagnosis by Year |                           |                           |                            |                            |                            |                            |                             |                             |                             |                  |
|-----------------------|-------------------------------------------|---------------------------|---------------------------|----------------------------|----------------------------|----------------------------|----------------------------|-----------------------------|-----------------------------|-----------------------------|------------------|
|                       | Overall                                   | 2013                      | 2014                      | 2015                       | 2016                       | 2017                       | 2018                       | 2019                        | 2020                        | 2021                        | P                |
| <b>Diagnoses</b>      |                                           |                           |                           |                            |                            |                            |                            |                             |                             |                             |                  |
| <b>CKD</b>            | <b>1.2</b><br>(2228/186924)               | <b>1.1</b><br>(194/7342)  | <b>0.8</b><br>(103/2705)  | <b>1.2</b><br>(205/6921)   | <b>1.3</b><br>(284/2346)   | <b>1.2</b><br>(255/0782)   | <b>1.4</b><br>(275/20158)  | <b>1.2</b><br>(301/24553)   | <b>1.1</b><br>(244/22998)   | <b>1.2</b><br>(251/21452)   | <b>&lt;0.001</b> |
| <b>ESRD</b>           | <b>0.7</b><br>(411/55333)                 | <b>0.9</b><br>(29/3213)   | <b>0.6</b><br>(27/4295)   | <b>1.4</b><br>(87/6199)    | <b>1.1</b><br>(71/6459)    | <b>0.7</b><br>(46/6336)    | <b>0.7</b><br>(42/5803)    | <b>0.3</b><br>(33/10427)    | <b>0.7</b><br>(40/5399)     | <b>0.4</b><br>(21/5120)     | <b>&lt;0.001</b> |
| <b>DM</b>             | <b>1.0</b><br>(3328/343012)               | <b>1.2</b><br>(294/25486) | <b>0.9</b><br>(193/22760) | <b>1.1</b><br>(377/34547)  | <b>1.1</b><br>(455/43409)  | <b>1.1</b><br>(444/40271)  | <b>0.9</b><br>(379/40445)  | <b>0.8</b><br>(327/41380)   | <b>0.9</b><br>(328/37833)   | <b>0.7</b><br>(287/40327)   | <b>&lt;0.001</b> |
| <b>Hypothyroidism</b> | <b>1.2</b><br>(2927/243897)               | <b>1.2</b><br>(252/20485) | <b>1.0</b><br>(197/19038) | <b>1.4</b><br>(350/25420)  | <b>1.3</b><br>(438/32973)  | <b>1.2</b><br>(330/28382)  | <b>1.3</b><br>(356/28235)  | <b>1.2</b><br>(345/28148)   | <b>1.1</b><br>(280/26050)   | <b>0.7</b><br>(172/23173)   | <b>&lt;0.001</b> |
| <b>Menopause</b>      | <b>1.5</b><br>(1480/97288)                | <b>1.6</b><br>(101/6325)  | <b>1.4</b><br>(114/8405)  | <b>1.6</b><br>(142/9068)   | <b>1.7</b><br>(194/11529)  | <b>1.6</b><br>(170/10473)  | <b>1.5</b><br>(185/12365)  | <b>1.8</b><br>(214/12231)   | <b>1.5</b><br>(170/11338)   | <b>1.0</b><br>(113/11281)   | <b>&lt;0.001</b> |
| <b>Statin Use</b>     | <b>1.2</b><br>(12253/1046270)             | <b>0.5</b><br>(320/65894) | <b>1.2</b><br>(920/74875) | <b>1.6</b><br>(1308/83139) | <b>1.3</b><br>(1071/85085) | <b>1.7</b><br>(1385/82792) | <b>1.3</b><br>(1470/11603) | <b>1.4</b><br>(1794/124341) | <b>1.0</b><br>(1585/152090) | <b>1.4</b><br>(2029/146556) | <b>&lt;0.001</b> |

The table shows the number of participants who had a relevant diagnosis in a given year and Lp(a) testing any time from 2012-2021. Values are presented as % (n with Lp(a) test / n diagnosed). The p-value refers to the trend in the rate of testing for each diagnosis of the study period. CKD = chronic kidney disease, ESRD = end-stage renal disease, DM = diabetes mellitus.
